# Supplementary material
Source: ML conference proceedings conference paper supplement (https://openaccess.thecvf.com/content/WACV2025/html/Lee_MFNeRF_Memory_Efficient_WACV_2025_paper.html)
Supplement: Supplementary file 1 [file Lee_MFNeRF_Memory_Efficient_WACV_2025_supplemental.pdf]

# Supplementary Material:

## MFNeRF: Memory Efficient NeRF with Mixed-Feature Hash Table

Yongjae Lee  
Arizona State University  
Tempe, AZ 85281  
ylee298@asu.edu

Li Yang  
University of North Carolina at Charlotte  
Charlotte, NC 28223  
lyang50@uncc.edu

Deliang Fan  
Arizona State University  
Tempe, AZ 85281  
dfan@asu.edu

### A. Experiment detail

We present detailed experimental results for each scene. Our experiments are conducted on the Synthetic NeRF [3], MipNeRF360 [1], Tanks&Temples [2], and Blended-MVS [4] datasets. In general, we use the hyperparameter settings listed in Tab. 5 as the default across these datasets and their scenes. Scene-specific settings are detailed in the subsequent paragraphs. For our experiment, we use the python implementation of InstantNGP, named ‘ngp-pl’<sup>1</sup>.

| Hyper-parameter | Description                                      | Value             |
|-----------------|--------------------------------------------------|-------------------|
| F               | Number of features per hash table entry          | 2                 |
| L               | Number of feature grids                          | 16                |
| M               | Number of mixed-feature hash tables              | 8                 |
| $N_{\min}$      | Coarsest resolution of feature grid              | 16                |
| $N_{\max}$      | Finest resolution of feature grid                | 1024              |
| lr              | Learning rate                                    | $2 \cdot 10^{-2}$ |
| decay           | Learning rate decay factor                       | $1 \cdot 10^{-2}$ |
| iters           | Number of optimization steps                     | 20k               |
| scale           | Scene scaling factor                             | 1                 |
| downsample      | Image downsampling ratio                         | 1                 |
| $rgb_{ch}$      | The number of hidden layer channels of color MLP | 128               |
| seed            | Random seed                                      | 1337              |
| batch           | Batch size of training rays                      | 16384             |

Table 5. Common hyperparameter settings across the datasets

**The Synthetic NeRF dataset** comprises eight scenes: Chair, Drums, Ficus, Hotdog, Lego, Materials, Mic, and Ship. Each scene provides 400 images with a resolution of  $800 \times 800$ . These images are divided as follows: 100 for train, 100 for evaluation, and 200 for test. As the evalu-

ation dataset is generally not utilized, we have omitted it, focusing solely on the training and testing sets. We employ a consistent set of hyperparameters across all eight scenes, as listed in Tab. 5. The results are presented in Tab. 7 and Fig. 6.

**The MipNeRF360 dataset** comprises seven scenes with backgrounds. These scenes are Bicycle (194 images), Bonsai (292 images), Counter (240 images), Garden (185 images), Kitchen (279 images), Room (311 images), and Stump (125 images). Since the scenes have different resolutions, we use a different downsampling ratio for each scene to fit within a resolution range between 1k and 1.6k. We detail the scene-specific settings in Tab. 6. Settings not listed in this table are consistent with those in Tab. 5. The results can be found in Tab. 8 and Fig. 7.

| Scene   | Original resolution | Scale | Downsample | Batch |
|---------|---------------------|-------|------------|-------|
| Bicycle | $4946 \times 3286$  | 16    | 0.25       | 8192  |
| Bonsai  | $3118 \times 2078$  | 16    | 0.5        | 8192  |
| Counter | $3115 \times 2076$  | 16    | 0.5        | 8192  |
| Garden  | $5187 \times 3361$  | 16    | 0.25       | 8192  |
| Kitchen | $3115 \times 2078$  | 4     | 0.5        | 8192  |
| Room    | $3114 \times 2075$  | 4     | 0.5        | 8192  |
| Stump   | $4978 \times 3300$  | 64    | 0.25       | 8192  |

Table 6. Scene-specific hyperparameter settings for MipNeRF360 [1]

**The Tanks&Temples dataset** comprises five scenes with backgrounds removed (whited out). These scenes are Barn (336/48 images for train/test), Caterpillar (322/46 images), Family (133/19 images), Ignatius (230/33 images), and Truck (218/32 images). All images has the same resolution of  $1920 \times 1080$ . We used the same setting to Synthetic NeRF dataset as listed in Tab. 5, except for  $N_{\max} = 512$ . The results can be found in Tab. 9 and Fig. 8.

**The BlendedMVS dataset** comprises four scenes with

<sup>1</sup>[https://github.com/kweal23/ngp\\_pl](https://github.com/kweal23/ngp_pl)

removed backgrounds. These scenes are Character (96/14 images for train/test), Fountain (79/12 images), Jade (50/8 images), and Statues (51/8 images). All images has the same resolution of  $768 \times 576$ . We used the same setting to Synthetic NeRF dataset as listed in Tab. 5, except Character scene. For Character scene, we use learning rate of  $8e-3$  and decay of  $2e-2$ . The results can be found in Tab. 10 and Fig. 9.

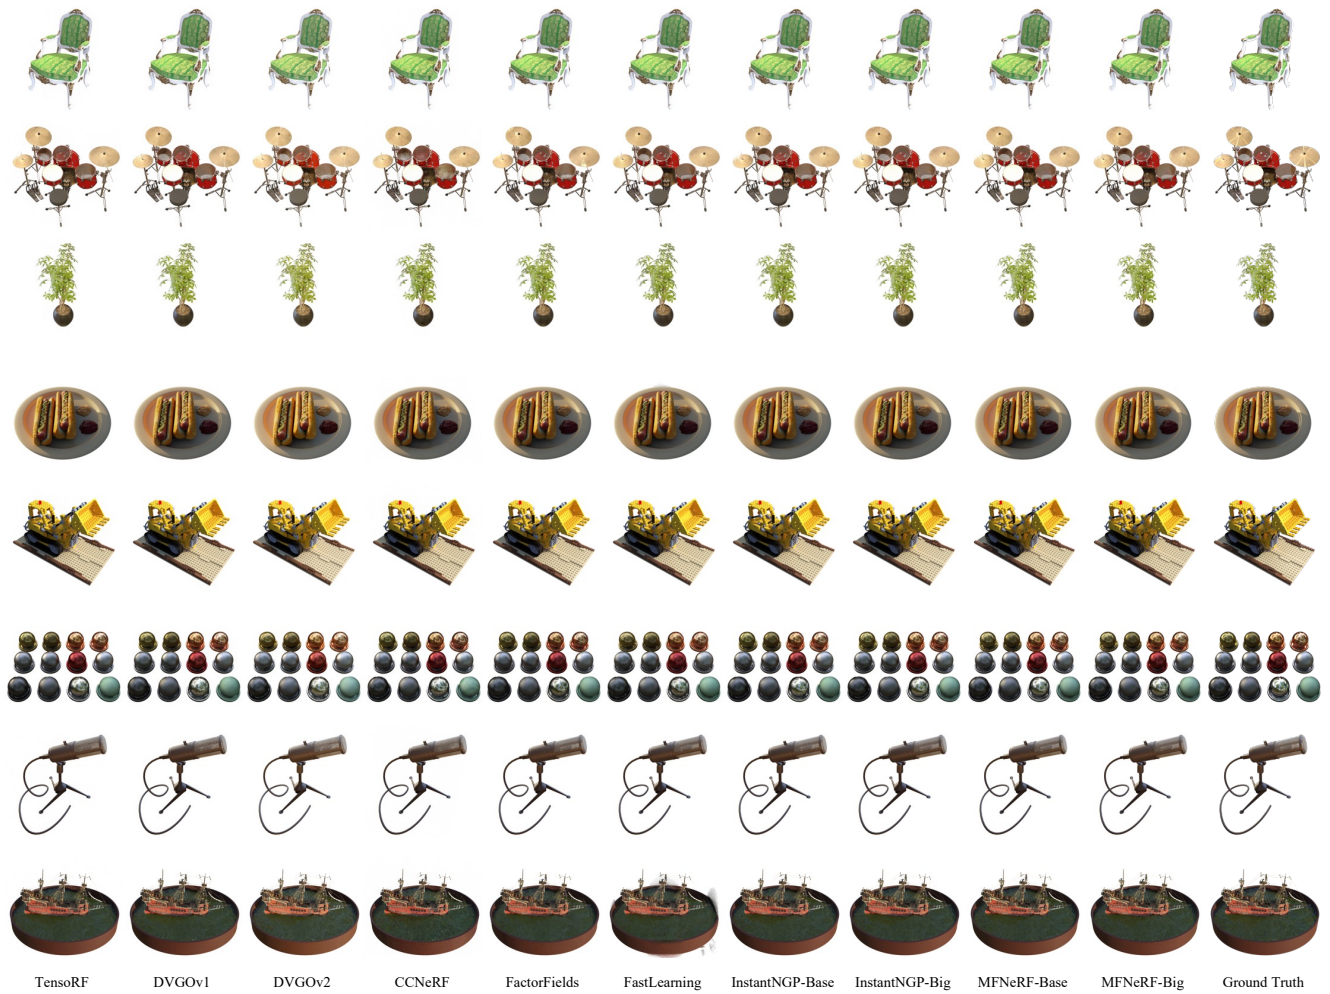

Figure 6. Qualitative result on Synthetic NeRF [3]

| Metrics       | Methods         | Chair  | Drums  | Ficus   | Hotdog | Lego   | Materials | Mic    | Ship    | Avg.   |
|---------------|-----------------|--------|--------|---------|--------|--------|-----------|--------|---------|--------|
| PSNR          | TensoRF         | 35.77  | 25.99  | 34.10   | 37.50  | 36.54  | 30.11     | 34.89  | 30.70   | 33.20  |
|               | DVGOv1          | 34.11  | 25.50  | 32.79   | 36.71  | 34.45  | 29.57     | 33.16  | 29.15   | 31.93  |
|               | DVGOv2          | 34.06  | 25.39  | 32.57   | 36.71  | 34.67  | 29.58     | 33.16  | 29.05   | 31.90  |
|               | CCNeRF          | 34.35  | 24.74  | 30.04   | 35.95  | 33.68  | 29.00     | 33.56  | 28.46   | 31.22  |
|               | FactorFields    | 35.59  | 25.72  | 34.33   | 37.05  | 35.69  | 29.40     | 36.69  | 30.29   | 33.09  |
|               | FastLearning    | 33.39  | 25.38  | 31.95   | 34.66  | 33.74  | 28.17     | 34.22  | 23.74   | 30.66  |
|               | InstantNGP-Base | 35.48  | 25.64  | 33.86   | 37.37  | 35.88  | 29.47     | 35.69  | 30.44   | 32.98  |
|               | InstantNGP-Big  | 35.55  | 25.76  | 34.06   | 37.32  | 35.97  | 29.55     | 35.49  | 30.40   | 33.01  |
|               | MFNeRF-Base     | 35.37  | 25.88  | 34.06   | 37.40  | 35.86  | 29.56     | 35.72  | 30.36   | 33.03  |
| MFNeRF-Big    | 35.56           | 25.79  | 34.16  | 37.41   | 36.04  | 29.47  | 35.82     | 30.58  | 33.11   |        |
| SSIM          | TensoRF         | 0.985  | 0.937  | 0.983   | 0.983  | 0.983  | 0.952     | 0.988  | 0.894   | 0.963  |
|               | DVGOv1          | 0.977  | 0.931  | 0.979   | 0.980  | 0.975  | 0.951     | 0.983  | 0.879   | 0.957  |
|               | DVGOv2          | 0.976  | 0.929  | 0.977   | 0.980  | 0.976  | 0.950     | 0.983  | 0.878   | 0.956  |
|               | CCNeRF          | 0.977  | 0.918  | 0.962   | 0.975  | 0.969  | 0.935     | 0.984  | 0.855   | 0.947  |
|               | FactorFields    | 0.985  | 0.938  | 0.983   | 0.982  | 0.979  | 0.946     | 0.991  | 0.885   | 0.961  |
|               | FastLearning    | 0.977  | 0.931  | 0.977   | 0.973  | 0.973  | 0.935     | 0.985  | 0.842   | 0.949  |
|               | InstantNGP-Base | 0.984  | 0.931  | 0.981   | 0.980  | 0.980  | 0.945     | 0.989  | 0.890   | 0.960  |
|               | InstantNGP-Big  | 0.982  | 0.932  | 0.982   | 0.981  | 0.981  | 0.946     | 0.989  | 0.889   | 0.960  |
|               | MFNeRF-Base     | 0.980  | 0.932  | 0.982   | 0.980  | 0.979  | 0.945     | 0.989  | 0.889   | 0.960  |
| MFNeRF-Big    | 0.985           | 0.932  | 0.982  | 0.981   | 0.980  | 0.946  | 0.990     | 0.889  | 0.961   |        |
| LPIPS (VGG)   | TensoRF         | 0.022  | 0.071  | 0.022   | 0.030  | 0.018  | 0.058     | 0.015  | 0.139   | 0.047  |
|               | DVGOv1          | 0.027  | 0.077  | 0.024   | 0.034  | 0.028  | 0.058     | 0.017  | 0.161   | 0.053  |
|               | DVGOv2          | 0.028  | 0.080  | 0.025   | 0.034  | 0.027  | 0.059     | 0.018  | 0.161   | 0.054  |
|               | CCNeRF          | 0.036  | 0.110  | 0.054   | 0.057  | 0.036  | 0.080     | 0.030  | 0.190   | 0.074  |
|               | FactorFields    | 0.019  | 0.068  | 0.020   | 0.032  | 0.024  | 0.067     | 0.012  | 0.153   | 0.049  |
|               | FastLearning    | 0.033  | 0.082  | 0.031   | 0.048  | 0.033  | 0.082     | 0.021  | 0.204   | 0.067  |
|               | InstantNGP-Base | 0.022  | 0.078  | 0.026   | 0.036  | 0.021  | 0.067     | 0.017  | 0.131   | 0.050  |
|               | InstantNGP-Big  | 0.021  | 0.077  | 0.025   | 0.035  | 0.020  | 0.065     | 0.017  | 0.124   | 0.048  |
|               | MFNeRF-Base     | 0.024  | 0.078  | 0.025   | 0.035  | 0.023  | 0.069     | 0.017  | 0.135   | 0.051  |
| MFNeRF-Big    | 0.021           | 0.077  | 0.025  | 0.034   | 0.020  | 0.067  | 0.016     | 0.128  | 0.048   |        |
| Training Time | TensoRF         | 654.13 | 651.47 | 822.97  | 834.85 | 746.50 | 1174.84   | 563.15 | 1009.09 | 807.13 |
|               | DVGOv1          | 537.86 | 524.40 | 565.63  | 659.03 | 564.34 | 654.65    | 482.72 | 721.90  | 588.82 |
|               | DVGOv2          | 197.04 | 195.08 | 209.19  | 257.88 | 221.87 | 263.90    | 171.81 | 333.70  | 231.31 |
|               | CCNeRF          | 866.86 | 946.49 | 1011.66 | 946.94 | 944.16 | 1317.62   | 751.28 | 1120.82 | 988.23 |
|               | FactorFields    | 617.27 | 544.23 | 571.26  | 649.41 | 630.36 | 798.91    | 513.02 | 705.99  | 628.81 |
|               | FastLearning    | 171.02 | 168.18 | 166.96  | 193.36 | 188.97 | 179.53    | 169.27 | 251.99  | 186.16 |
|               | InstantNGP-Base | 204.45 | 194.03 | 164.00  | 255.86 | 226.90 | 221.35    | 163.97 | 380.94  | 226.44 |
|               | InstantNGP-Big  | 298.34 | 287.26 | 240.69  | 375.75 | 335.96 | 323.64    | 242.78 | 540.10  | 330.57 |
|               | MFNeRF-Base     | 194.47 | 185.03 | 149.60  | 249.70 | 222.51 | 217.78    | 150.26 | 392.20  | 220.19 |
| MFNeRF-Big    | 255.46          | 240.37 | 194.30 | 330.68  | 291.79 | 282.67 | 195.18    | 521.75 | 289.03  |        |
| FPS           | TensoRF         | 1.20   | 1.07   | 1.13    | 1.09   | 1.09   | 0.88      | 1.20   | 0.77    | 1.05   |
|               | DVGOv1          | 2.41   | 2.15   | 2.31    | 1.73   | 2.10   | 1.70      | 2.44   | 1.40    | 2.03   |
|               | DVGOv2          | 6.68   | 5.57   | 6.92    | 5.22   | 5.74   | 4.95      | 6.33   | 3.17    | 5.57   |
|               | CCNeRF          | 1.02   | 0.76   | 0.93    | 0.99   | 0.94   | 0.87      | 1.02   | 0.67    | 0.90   |
|               | FactorFields    | 0.79   | 0.79   | 0.84    | 0.82   | 0.77   | 0.74      | 0.81   | 0.68    | 0.78   |
|               | FastLearning    | 32.17  | 28.97  | 29.28   | 26.38  | 27.23  | 16.27     | 33.00  | 9.36    | 25.33  |
|               | InstantNGP-Base | 59.03  | 32.73  | 46.85   | 33.54  | 38.93  | 19.90     | 51.55  | 10.44   | 36.62  |
|               | InstantNGP-Big  | 43.61  | 26.64  | 39.37   | 26.51  | 31.23  | 16.78     | 43.18  | 8.02    | 29.42  |
|               | MFNeRF-Base     | 61.82  | 34.81  | 47.91   | 35.68  | 39.37  | 19.57     | 52.55  | 10.54   | 37.78  |
| MFNeRF-Big    | 50.84           | 29.24  | 42.90  | 28.63   | 34.07  | 16.88  | 45.70     | 8.54   | 32.10   |        |
| Memory        | TensoRF         | 67.09  | 67.14  | 70.00   | 82.19  | 67.99  | 83.77     | 66.12  | 70.06   | 71.79  |
|               | DVGOv1          | 208.92 | 209.55 | 209.33  | 209.03 | 208.11 | 210.31    | 209.52 | 208.68  | 209.18 |
|               | DVGOv2          | 205.06 | 205.68 | 205.48  | 205.18 | 205.25 | 206.43    | 204.47 | 204.82  | 205.30 |
|               | CCNeRF          | 874.90 | 957.24 | 1020.22 | 956.21 | 953.01 | 1326.66   | 760.03 | 1133.90 | 997.77 |
|               | FactorFields    | 20.44  | 20.43  | 20.41   | 20.45  | 20.46  | 20.49     | 20.47  | 20.41   | 20.44  |
|               | FastLearning    | 54.98  | 54.98  | 54.98   | 54.98  | 54.98  | 54.98     | 54.98  | 54.98   | 54.98  |
|               | InstantNGP-Base | 112.63 | 112.63 | 112.63  | 112.63 | 112.63 | 112.63    | 112.63 | 112.63  | 112.63 |
|               | InstantNGP-Big  | 300.09 | 300.09 | 300.09  | 300.09 | 300.09 | 300.09    | 300.09 | 300.09  | 300.09 |
|               | MFNeRF-Base     | 74.91  | 74.91  | 74.91   | 74.91  | 74.91  | 74.91     | 74.91  | 74.91   | 74.91  |
| MFNeRF-Big    | 173.63          | 173.63 | 173.63 | 173.63  | 173.63 | 173.63 | 173.63    | 173.63 | 173.63  |        |

Table 7. Scene by scene results on the synthetic dataset (Synthetic NeRF [3])

| Metrics       | Methods         | Bicycle | Bonsai  | Counter | Garden  | Kitchen | Room    | Stump   | Avg.    |
|---------------|-----------------|---------|---------|---------|---------|---------|---------|---------|---------|
| PSNR          | DVGOv2          | 22.13   | 27.77   | 25.72   | 24.33   | 26.00   | 28.40   | 23.57   | 25.42   |
|               | InstantNGP-Base | 23.38   | 29.65   | 26.62   | 25.35   | 29.13   | 29.47   | 23.31   | 26.70   |
|               | InstantNGP-Big  | 23.28   | 30.11   | 26.72   | 25.85   | 29.41   | 29.69   | 23.26   | 26.90   |
|               | MFNeRF-Base     | 23.59   | 29.70   | 26.61   | 25.14   | 28.94   | 29.08   | 24.07   | 26.73   |
|               | MFNeRF-Big      | 23.61   | 30.20   | 26.77   | 25.51   | 29.44   | 29.44   | 23.80   | 26.97   |
| SSIM          | DVGOv2          | 0.481   | 0.829   | 0.783   | 0.628   | 0.709   | 0.852   | 0.580   | 0.694   |
|               | InstantNGP-Base | 0.546   | 0.883   | 0.804   | 0.682   | 0.846   | 0.868   | 0.563   | 0.742   |
|               | InstantNGP-Big  | 0.570   | 0.898   | 0.820   | 0.734   | 0.866   | 0.880   | 0.589   | 0.765   |
|               | MFNeRF-Base     | 0.545   | 0.877   | 0.790   | 0.653   | 0.836   | 0.863   | 0.578   | 0.735   |
|               | MFNeRF-Big      | 0.569   | 0.892   | 0.812   | 0.714   | 0.862   | 0.875   | 0.598   | 0.760   |
| LPIPS (VGG)   | DVGOv2          | 0.510   | 0.402   | 0.435   | 0.376   | 0.400   | 0.425   | 0.460   | 0.430   |
|               | InstantNGP-Base | 0.490   | 0.304   | 0.376   | 0.312   | 0.251   | 0.360   | 0.466   | 0.366   |
|               | InstantNGP-Big  | 0.459   | 0.274   | 0.345   | 0.268   | 0.224   | 0.329   | 0.441   | 0.334   |
|               | MFNeRF-Base     | 0.488   | 0.327   | 0.399   | 0.341   | 0.264   | 0.375   | 0.465   | 0.380   |
|               | MFNeRF-Big      | 0.464   | 0.288   | 0.361   | 0.288   | 0.228   | 0.342   | 0.438   | 0.344   |
| Training Time | DVGOv2          | 772.04  | 707.37  | 749.62  | 716.16  | 681.92  | 722.30  | 811.65  | 737.29  |
|               | InstantNGP-Base | 422.65  | 394.50  | 522.34  | 488.76  | 391.78  | 284.82  | 814.09  | 474.13  |
|               | InstantNGP-Big  | 764.00  | 694.17  | 743.79  | 747.52  | 606.19  | 453.29  | 1259.91 | 752.69  |
|               | MFNeRF-Base     | 388.18  | 414.87  | 535.11  | 558.65  | 408.27  | 290.03  | 673.01  | 466.87  |
|               | MFNeRF-Big      | 620.49  | 634.85  | 698.61  | 736.27  | 569.26  | 456.45  | 988.32  | 672.04  |
| FPS           | DVGOv2          | 0.72    | 0.50    | 0.45    | 0.72    | 0.51    | 0.49    | 0.66    | 0.58    |
|               | InstantNGP-Base | 4.55    | 5.08    | 3.72    | 5.00    | 6.29    | 5.06    | 2.58    | 4.61    |
|               | InstantNGP-Big  | 3.32    | 3.43    | 3.29    | 3.80    | 5.12    | 4.74    | 1.76    | 3.64    |
|               | MFNeRF-Base     | 4.62    | 4.55    | 3.62    | 5.13    | 6.50    | 4.74    | 3.11    | 4.61    |
|               | MFNeRF-Big      | 3.47    | 3.74    | 3.18    | 4.34    | 5.54    | 4.14    | 2.21    | 3.80    |
| Memory        | DVGOv2          | 1640.53 | 1640.53 | 1640.53 | 1640.53 | 1640.53 | 1640.53 | 1640.53 | 1640.53 |
|               | InstantNGP-Base | 173.51  | 173.51  | 173.51  | 173.51  | 151.60  | 151.60  | 194.66  | 170.27  |
|               | InstantNGP-Big  | 443.70  | 443.70  | 443.70  | 443.70  | 399.60  | 399.60  | 482.66  | 436.67  |
|               | MFNeRF-Base     | 124.84  | 124.84  | 124.84  | 124.84  | 106.56  | 106.56  | 145.48  | 122.57  |
|               | MFNeRF-Big      | 268.84  | 268.84  | 268.84  | 268.84  | 234.56  | 234.56  | 289.48  | 261.99  |

Table 8. Scene by scene results on the unbounded dataset (MipNeRF360 [1])

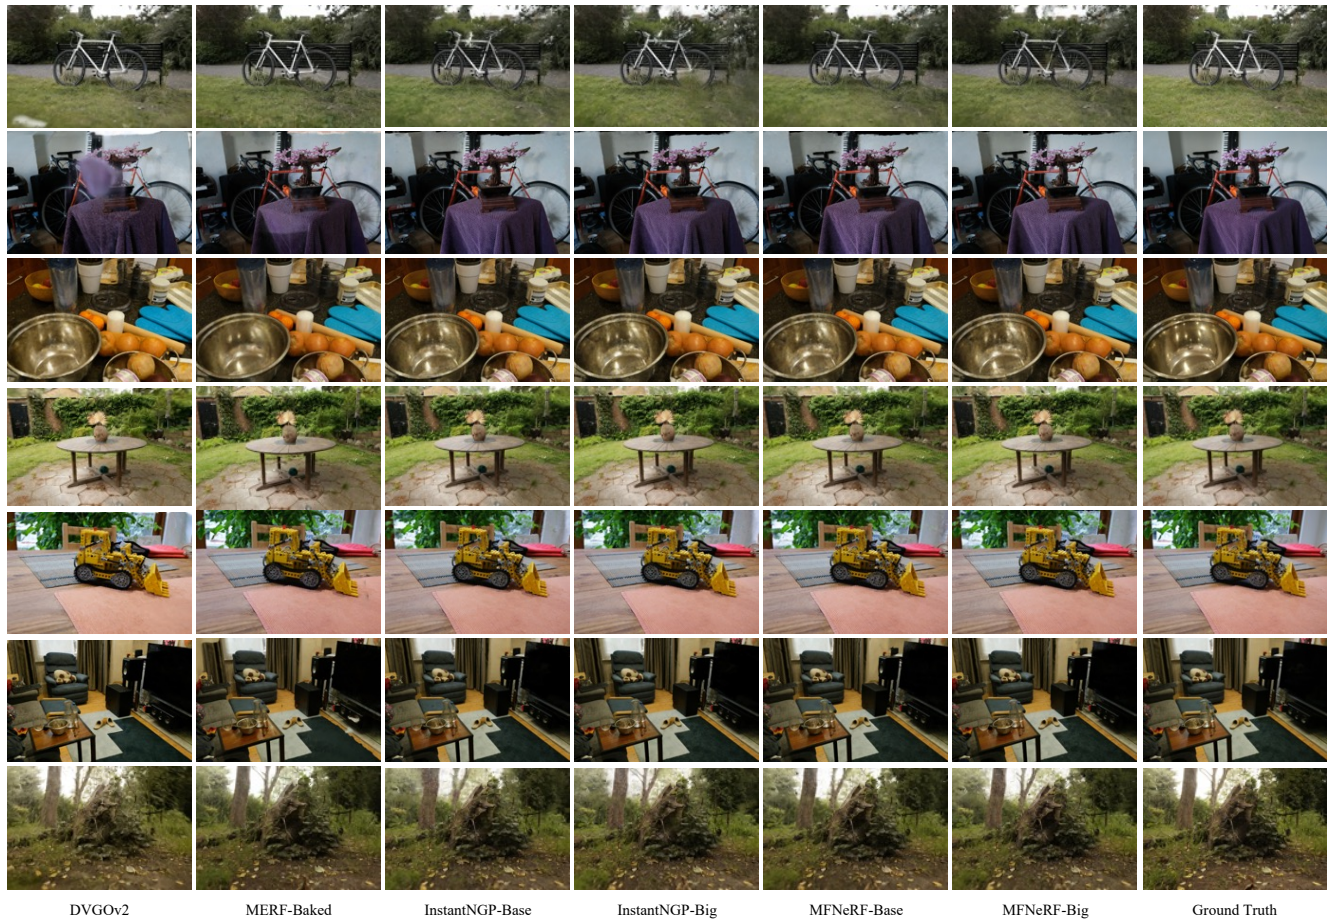

DVGOv2      MERF-Baked      InstantNGP-Base      InstantNGP-Big      MFNeRF-Base      MFNeRF-Big      Ground Truth

Figure 7. Qualitative result on MipNeRF360 [1].

| Metrics        | Methods         | Barn   | Caterpillar | Family | Ignatius | Truck  | Avg    |
|----------------|-----------------|--------|-------------|--------|----------|--------|--------|
| PSNR           | InstantNGP-Base | 27.78  | 25.98       | 34.36  | 28.11    | 27.54  | 28.75  |
|                | InstantNGP-Big  | 27.85  | 26.17       | 34.50  | 28.29    | 27.63  | 28.89  |
|                | MFNeRF-Base     | 27.75  | 26.03       | 34.25  | 28.14    | 27.61  | 28.76  |
|                | MFNeRF-Big      | 27.87  | 25.81       | 34.33  | 28.11    | 27.62  | 28.75  |
| SSIM           | InstantNGP-Base | 0.866  | 0.913       | 0.964  | 0.946    | 0.912  | 0.920  |
|                | InstantNGP-Big  | 0.876  | 0.915       | 0.966  | 0.948    | 0.917  | 0.925  |
|                | MFNeRF-Base     | 0.865  | 0.909       | 0.963  | 0.945    | 0.909  | 0.918  |
|                | MFNeRF-Big      | 0.881  | 0.915       | 0.965  | 0.947    | 0.921  | 0.926  |
| LPIPS<br>(VGG) | InstantNGP-Base | 0.239  | 0.153       | 0.053  | 0.077    | 0.136  | 0.132  |
|                | InstantNGP-Big  | 0.223  | 0.149       | 0.050  | 0.075    | 0.130  | 0.125  |
|                | MFNeRF-Base     | 0.250  | 0.163       | 0.057  | 0.078    | 0.142  | 0.138  |
|                | MFNeRF-Big      | 0.224  | 0.156       | 0.053  | 0.077    | 0.134  | 0.129  |
| Memory         | InstantNGP-Base | 112.63 | 112.63      | 112.63 | 112.63   | 112.63 | 112.63 |
|                | InstantNGP-Big  | 300.09 | 300.09      | 300.09 | 300.09   | 300.09 | 300.09 |
|                | MFNeRF-Base     | 77.10  | 77.10       | 77.10  | 77.10    | 77.10  | 77.10  |
|                | MFNeRF-Big      | 192.97 | 192.97      | 192.97 | 192.97   | 192.97 | 192.97 |

Table 9. Scene by scene results on Tanks&Temples [2]

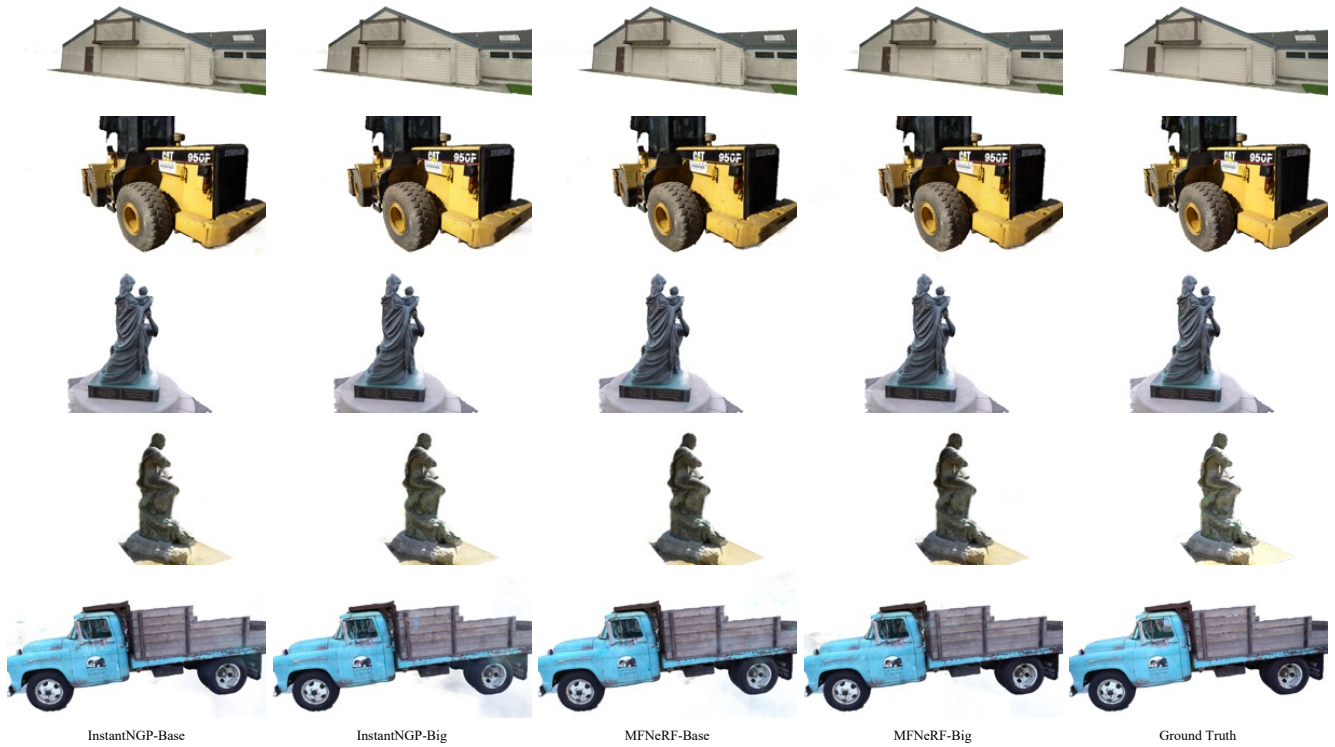

Figure 8. Qualitative result on Tanks&Temples [2].

| Metrics        | Methods         | Character | Fountain | Jade   | Statues | Avg.   |
|----------------|-----------------|-----------|----------|--------|---------|--------|
| PSNR           | InstantNGP-Base | 30.75     | 26.92    | 25.68  | 26.03   | 27.35  |
|                | InstantNGP-Big  | 30.78     | 26.67    | 25.69  | 26.66   | 27.45  |
|                | MFNeRF-Base     | 30.72     | 26.81    | 25.76  | 26.23   | 27.38  |
|                | MFNeRF-Big      | 30.75     | 26.78    | 25.89  | 25.91   | 27.33  |
| SSIM           | InstantNGP-Base | 0.968     | 0.927    | 0.890  | 0.903   | 0.922  |
|                | InstantNGP-Big  | 0.968     | 0.924    | 0.884  | 0.910   | 0.922  |
|                | MFNeRF-Base     | 0.967     | 0.924    | 0.888  | 0.902   | 0.920  |
|                | MFNeRF-Big      | 0.968     | 0.925    | 0.887  | 0.901   | 0.920  |
| LPIPS<br>(VGG) | InstantNGP-Base | 0.037     | 0.097    | 0.123  | 0.097   | 0.088  |
|                | InstantNGP-Big  | 0.038     | 0.100    | 0.130  | 0.092   | 0.090  |
|                | MFNeRF-Base     | 0.039     | 0.105    | 0.121  | 0.097   | 0.090  |
|                | MFNeRF-Big      | 0.038     | 0.101    | 0.130  | 0.098   | 0.092  |
| Memory         | InstantNGP-Base | 112.63    | 112.63   | 112.63 | 112.63  | 112.63 |
|                | InstantNGP-Big  | 300.09    | 300.09   | 300.09 | 300.09  | 300.09 |
|                | MFNeRF-Base     | 74.91     | 74.91    | 74.91  | 74.91   | 74.91  |
|                | MFNeRF-Big      | 173.63    | 173.63   | 173.63 | 173.63  | 173.63 |

Table 10. Scene by scene results on BlendedMVS [4]

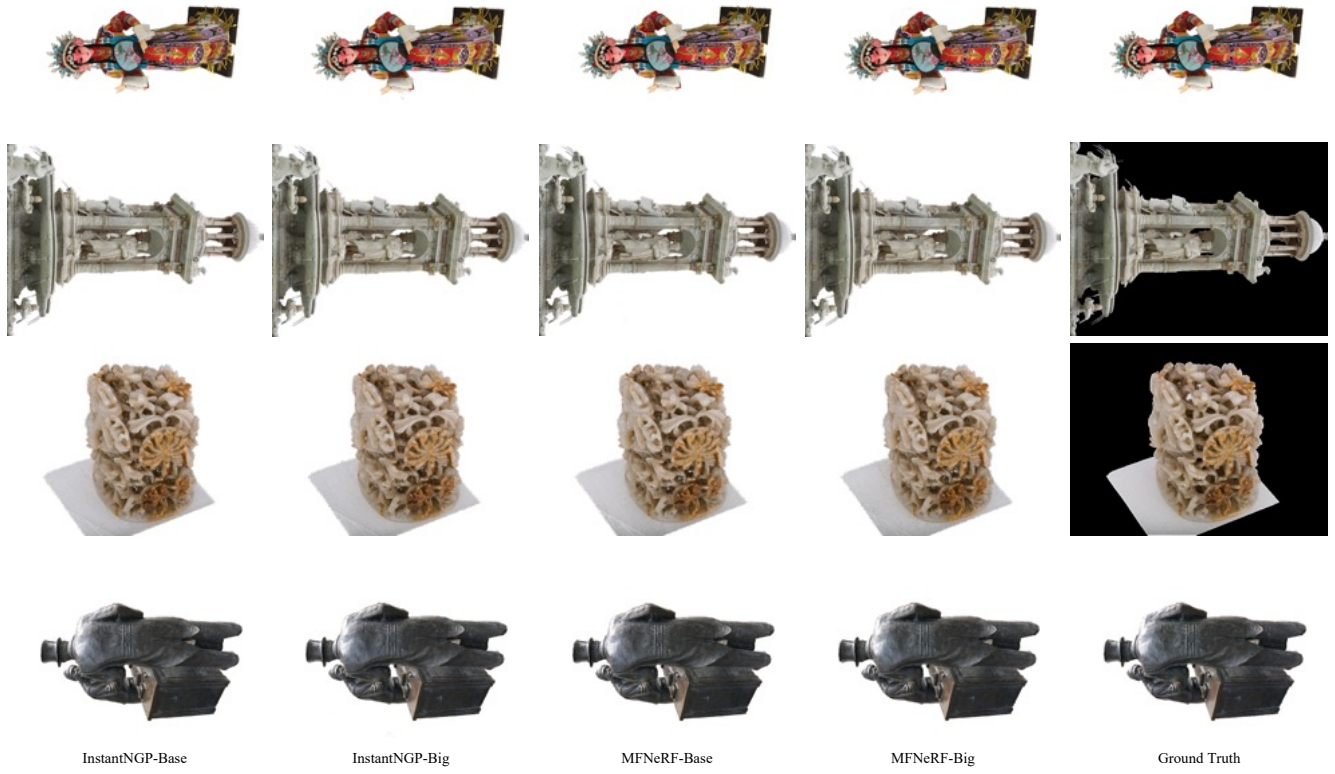

Figure 9. Qualitative result on BlendedMVS [4].



## References

- [1] Jonathan T Barron, Ben Mildenhall, Dor Verbin, Pratul P Srinivasan, and Peter Hedman. Mip-NeRF 360: Unbounded Anti-Aliased Neural Radiance Fields. In *2022 IEEE/CVF Conference on Computer Vision and Pattern Recognition (CVPR)*, pages 5460–5469, New Orleans, LA, USA, 6 2022. IEEE. [1](#), [5](#), [6](#)
- [2] Arno Knapitsch, Jaesik Park, Qian-Yi Zhou, and Vladlen Koltun. Tanks and temples: benchmarking large-scale scene reconstruction. *ACM Trans. Graph.*, 36(4):1–13, 7 2017. [1](#), [6](#), [7](#)
- [3] Ben Mildenhall, Pratul P Srinivasan, Matthew Tancik, Jonathan T Barron, Ravi Ramamoorthi, and Ren Ng. NeRF: Representing Scenes as Neural Radiance Fields for View Synthesis. In Andrea Vedaldi, Horst Bischof, Thomas Brox, and Jan-Michael Frahm, editors, *Computer Vision – ECCV 2020*, pages 405–421, Cham, 2020. Springer International Publishing. [1](#), [3](#), [4](#)
- [4] Y Yao, Z Luo, S Li, J Zhang, Y Ren, L Zhou, T Fang, and L Quan. BlendedMVS: A Large-Scale Dataset for Generalized Multi-View Stereo Networks. In *2020 IEEE/CVF Conference on Computer Vision and Pattern Recognition (CVPR)*, pages 1787–1796, Los Alamitos, CA, USA, 6 2020. IEEE Computer Society. [1](#), [7](#), [8](#)
